# Supplementary material
Source: MDPI journal article supplement (https://www.mdpi.com/2311-7524/10/3/199)
Supplement: s1 [file s1]

# Supplementary sequences 1

## > Watermelon silver mottle virus (WSMoV) N gene

GCTGTTCCAGGGTACTTTCACTGAGTATTTTGACAGCCTGTTTGAACATAACATCCAAATCATCCTTA  
AATTCAACCTGTGAAGCAGAAAGAACCTTAGCCACCTTACAACTTGCTCATAGGTGGAGAAGTTCT  
TTATACCCAACCTTTTCTTTCTTTATATTTTGGTAATAAGCTAAAGGGAAAATAATCGGTGCCAGTCCCCT  
TATACTAGATAAAAAGAGGTAGAGGTCTCCAATACATAACATCATCCTCAAGGCACAAGAATCATAAGA  
TGCGGGCACATTCAACCCATAAGCAGCAACTAATGGTAGTTCCATGATTTTCCCATACATTTCTGTGTC  
TAGCAGCTTCATTCTTGCTTTTCTCTACCATACTAACTATTTTGTCTGATAAAAAGCTTCTGTCTCTT  
GAATGTCCAGTCCTCAGGTCCGACGTCAACACTTGTGGCAACAATATTTTACCGCAAAAATTATACT  
TACCGCTCTTGCAGGCTGCAAAAATCTGTTTCTGTCATTTTAGGATATTCAAGCAGTTTGTAAGGTT  
ATCTCTATATTTTGTGTTGTAAAAAAGCTTTGAAGCTAAATCCGGGAGTGGAGTCC

## > Melon yellow spot virus (MYSV) N gene

TTAAACTTCAATGGACTTAGATCTGGAAGAAGAAGCTTTACTCTTAGAAGAGCTCTCACCCATTCCAT  
CAACTACAAGAGAGGATTTGAAAGCCTGTTCCATGAATTGCACCTGTTTCATTGTAAATCTTCAGGGAT  
ATGCCACTGGTTGTTCTGCTGGTTGCAGTCAGCCAAGATCTTACACAACCTTTTAAAAGTTTCATCAA  
ATTCTTTCTTGAAGGTCATATTGCTAGCAGACATAACGCGAGCAATTTTGCAGATCTGCTCATATGTAG  
AGAAATTCTTTATTCCTAATTGCTCTTTCTTGACATTCTGAAAAATAGGCCAAAGGCAGGACAACAGGG  
CAGAGCGAATGCAGACTAGCAAGCAAAGACAGAGGTCTCCAATGCATAGCATTAACTCTCAAAGCTG  
TCATGTCAAACCTTTGCAGGCACAGTTAAACCATATGCAGCAACCAATGGAAGCTGCATGGCTTTCTC  
ATACATTTTCTGCTTTTCTTCTCCTCATTCTCTGTTTTTCTGCAATGCTGATCATCAAAGTTCTGATAACA  
GCTTCAGTTCGTTTAAATGTCCAATCATTAGGACCAACATTATCCCAGATGCAACTATCTTTTTCCCG  
CAAACTTGTAGTTTCCAGATTTGCAAGCTGCATAAACTTGTTTTCTGCTTTTCAGAATAGTTATACCG  
TTATTATAATTTAATTTACCTCATCTCTCACATCCGTAAAGAATGAATGGAAGTTAAATCCTTCGGCTG  
ATTCCTCTGTTTCTATTTCAACTCCGACTTGCCACCACTAAGAAGTTCTTGGATTTTCTCCTTTGTCA  
GCTTAGCAACGGTAGACATGGTGTCTTACTTAGGAAACGTGTACTTTGACTTGCTGATGTTGAATT

## Supplementary table S1

Supplementary table S1 the primers used for detecting the virus

| Names      | Sequences(5'-3')            |
|------------|-----------------------------|
| WSMoV-S-F  | GCTGTTCCAGGGTACTTTC         |
| WSMoV-S-R  | GGACTCCACTCCCGGATTTA        |
| MYSV-cp-F  | TTAAACTTCAATGGACTTAGATC     |
| MYSV-cp-R  | ATTCAACATCAGCAAGTCAA        |
| TSWV-2118F | CAAGCAAGTTCTGTGAGTTTTGCCT   |
| TSWV-2894R | ATGTCTAAGGTTAAGCTCACTAAG    |
| TCSV-2415F | TCATGCAACACCTGAAATTTTGGC    |
| TCSV-3191R | TCTAAGG TCAAGCTCAC CAGAG    |
| INSV-2075F | TTAAAT AGAATCATTT TTCCCAAAA |
| INSV-2863R | ATGAACAAAGCAAAGATTACCAA     |

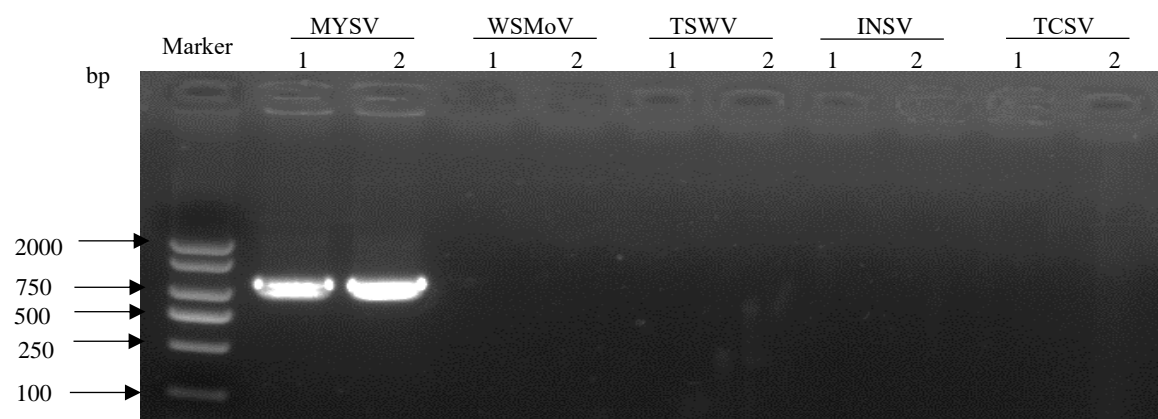

Supplementary figure S1. 1.0% electrophoresis gel of agarose
